# Supplementary material for: Non invasive angiographic results of aneurysms treated with Woven EndoBridge (WEB) devices or coils: an inter- and intra-observer reliability study
Source: Research Square preprint supplement (doi:10.21203/rs.3.rs-6657069/v1), 2025-05-22
Supplement: Supplementary file 1 [file 95fbfda77195672b4093ca67.docx]

**Supplementary Material**

**Supplemental Table 1: Individual intra-rater agreement and correlation between occlusion grade and clinical decision for each rater**

| **Rater** | **Intra-rater Agreement**  κG (95%CI) | | **Correlation between grade and clinical decision**  Cramer V (95%CI) |
| --- | --- | --- | --- |
| **Occlusion Grade** | **Clinical Decision** |
| 1 | 0.75 (0.62, 0.89) | 0.80 (0.71, 0.90) | 0.63 (0.45, 0.76) |
| 2 | 0.79 (0.69, 0.90) | 0.71 (0.57, 0.85) | 0.87 (0.79, 0.92) |
| 3 | NC | NC | 0.76 (0.63, 0.85) |
| 4 | 0.82 (0.73, 0.91) | 0.89 (0.82, 0.97) | 0.77 (0.64, 0.86) |
| 5 | 0.82 (0.71, 0.93) | 0.79 (0.66, 0.93) | 0.92 (0.87, 0.95) |
| 6 | 0.85 (0.74, 0.97) | 0.90 (0.79, 1.00) | 0.96 (0.93, 0.98) |
| 7 | 0.78 (0.69, 0.88) | 0.89 (0.80, 0.98) | 0.65 (0.47, 0.77) |
| 8 | 0.82 (0.73, 0.91) | 0.89 (0.80, 0.97) | 0.58 (0.38, 0.73) |
| 9 | **NC** | NC | 0.57 (0.37, 0.72) |
| 10 | 0.91 (0.84, 0.98) | 0.94 (0.88, 0.99) | 0.69 (0.53, 0.8) |
| 11 | 0.88 (0.80, 0.96) | 0.83 (0.74, 0.93) | 0.62 (0.43, 0.75) |
| 12 | 0.84 (0.75, 0.93) | 0.83 (0.74, 0.92) | 0.82 (0.72, 0.89) |
| 13 | 0.79 (0.67, 0.91) | 0.81 (0.71, 0.90) | 0.95 (0.92, 0.97) |
| 14 | 0.81 (0.71, 0.91) | 0.80 (0.70, 0.90) | 1.00 (1.00, 1.00) |
| 15 | 0.77 (0.63, 0.92) | 0.89 (0.80, 0.98) | 0.6 (0.41, 0.74) |
| 16 | NC | NC | 0.73 (0.59, 0.83) |
| 17 | NC | NC | 1.00 (1.00, 1.00) |
| 18 | 0.82 (0.74, 0.91) | 0.79 (0.70, 0.89) | 0.88 (0.81, 0.93) |
| 19 | NC | NC | 0.76 (0.63, 0.85) |
| 20 | 0.87 (0.79, 0.95) | 0.87 (0.78, 0.97) | 0.68 (0.51, 0.79) |
| 21 | 0.83 (0.72, 0.95) | 0.80 (0.68, 0.92) | 0.97 (0.96, 0.98) |
| 22 | NC | NC | 0.85 (0.76, 0.91) |
| 23 | 0.90 (0.82, 0.97) | 0.90 (0.83, 0.98) | 0.66 (0.49, 0.78) |
| 24 | NC | NC | 0.71 (0.55, 0.81) |
| 25 | 0.85 (0.77, 0.94) | 0.79 (0.69, 0.89) | 0.72 (0.57, 0.83) |
| 26 | 0.83 (0.74, 0.92) | 0.90 (0.83, 0.97) | 0.66 (0.49, 0.78) |
| 27 | 0.68 (0.52, 0.84) | 0.76 (0.63, 0.89) | 0.88 (0.8, 0.93) |
| 28 | 0.78 (0.66, 0.91) | 0.81 (0.70, 0.92) | 0.89 (0.82, 0.93) |
| 29 | 0.79 (0.69, 0.89) | 0.86 (0.77, 0.95) | 0.72 (0.57, 0.82) |
| 30 | 0.87 (0.79, 0.95) | 0.79 (0.70, 0.89) | 0.78 (0.65, 0.86) |

NC: not calculable

**Supplemental Figures**

**Supplemental Figure 1. Clinical management adjudications (n=900) per chosen occlusion grade for aneurysms treated with coils**

An adjudication is defined as a rater’s choice of angiographic grade and clinical follow-up management for a selected treated aneurysm. FU: follow-up.

**Supplemental Figure 2. Clinical management adjudications (n=900) per chosen occlusion grade for aneurysms treated with WEB devices**

An adjudication is defined as a rater’s choice of angiographic grade and clinical follow-up management for a selected treated aneurysm. FU: follow-up.
